# Supplementary material for: Biosensor-based growth-coupling as an evolutionary strategy to improve heme export in Corynebacterium glutamicum
Source: PubMed Central journal article supplement (PMC11472508; doi:10.1186/s12934-024-02556-1), 2024-10-14
Supplement: 12934_2024_2556_MOESM1_ESM.pdf [file 12934_2024_2556_MOESM1_ESM.pdf]

# Supplements to: Biosensor-based growth-coupling as an evolutionary strategy to improve heme export in *Corynebacterium glutamicum*

Aileen Krüger<sup>1</sup>, Janik Göttsche<sup>1</sup>, Michael Osthege<sup>1</sup>, Luis Navratil<sup>1</sup>, Ulrike Weber<sup>1</sup>, Marco Oldiges<sup>1</sup>, Julia Frunzke<sup>1\*</sup>

<sup>1</sup> Forschungszentrum Jülich GmbH, Institute for Bio- and Geosciences 1, IBG1, 52425 Jülich, Germany

## \* Correspondence:

Corresponding Author

[j.frunzke@fz-juelich.de](mailto:j.frunzke@fz-juelich.de)

## Figures:

Figure S1: Growth of different *C. glutamicum* heme-coupled biosensor strains in iron-rich conditions, first round

Figure S2: Growth of different *C. glutamicum* heme-coupled biosensor strains in iron-rich conditions, second round

Figure S3: Screening of evolved *::PhrtB-pfkA* clones for elevated *hrtB* expression

Figure S4: Screening of evolved *::PhrtB-aceE* clones for elevated *hrtB* expression

Figure S5: Correlation of *hrtB*-expression at 4 h (peak specific fluorescence) and colony size

Figure S6: Screening of evolved *::P<sub>hrtB</sub>-pfkA* and *::P<sub>hrtB</sub>-aceE* strains for increased *hrtB* expression

Figure S7: qPCR analysis comparing expression levels of *hrtB* in a selection of clones from plate-based selections and fALE in comparison to the *C. glutamicum* WT

Figure S8: Influence on *cydD* single nucleotide polymorphisms on *hrtB* expression

Figure S9: Growth analysis of a *cydD*-deficient *C. glutamicum* strain in iron excess

## Tables:

Table S1: Oligonucleotides used in this study

Table S2: Further (non-key) mutations established from ALE experiments with *C. glutamicum* *::P<sub>hrtB</sub>-pfkA* and *::P<sub>hrtB</sub>-aceE*

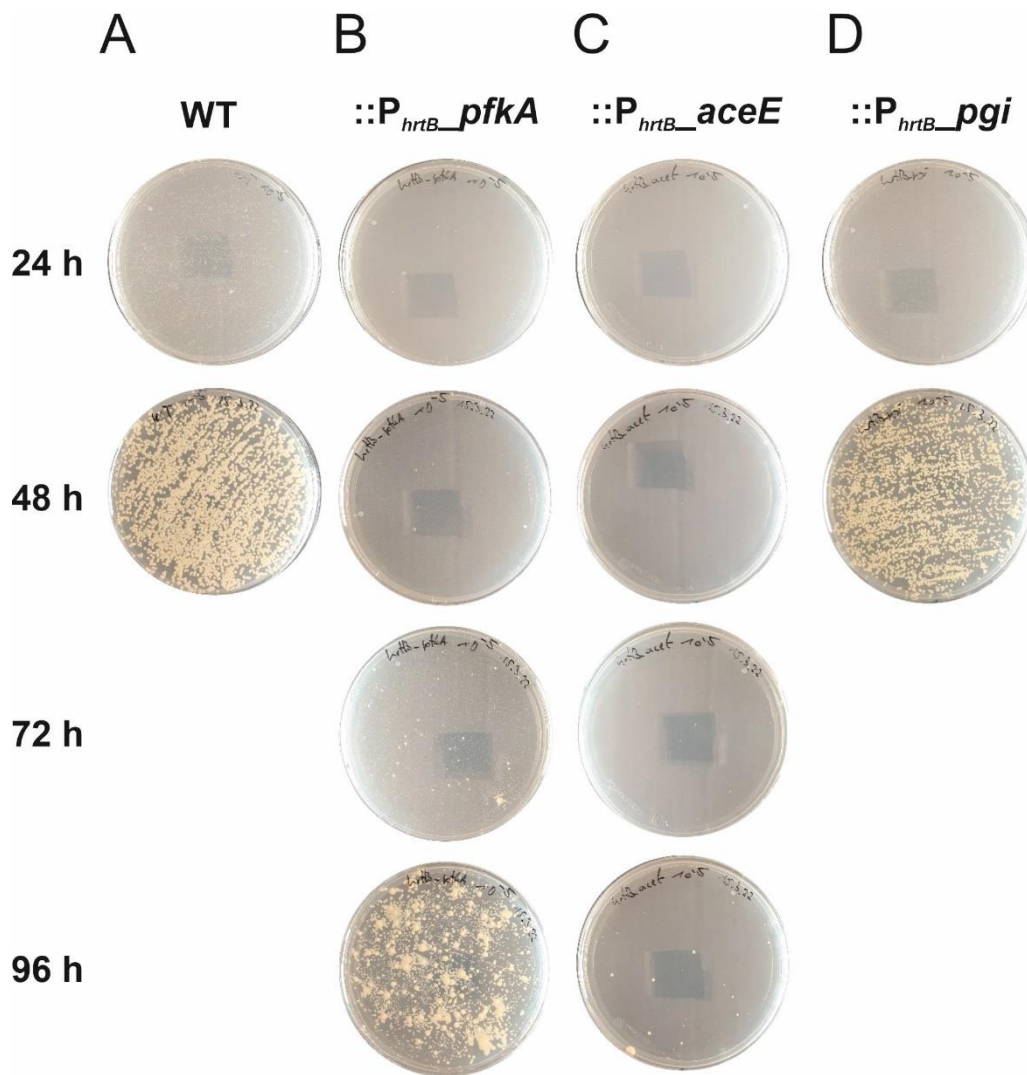

**Figure S1: Growth of different *C. glutamicum* heme-coupled biosensor strains in iron-rich conditions, first round.** *C. glutamicum* ATCC 13032 (A) WT, (B) ::P<sub>hrtB</sub>\_pfkA, (C) ::P<sub>hrtB</sub>\_aceE and (D) ::P<sub>hrtB</sub>\_pgi were cultivated overnight in BHI, 30°C. Cultures were diluted by a factor of 10<sup>-5</sup> in 0.9% NaCl and plated on CGXII agar with 2% glucose and an iron excess of 100 μM FeSO<sub>4</sub>. Photographs were taken after 1, 2, 3 and 4 days of incubation.

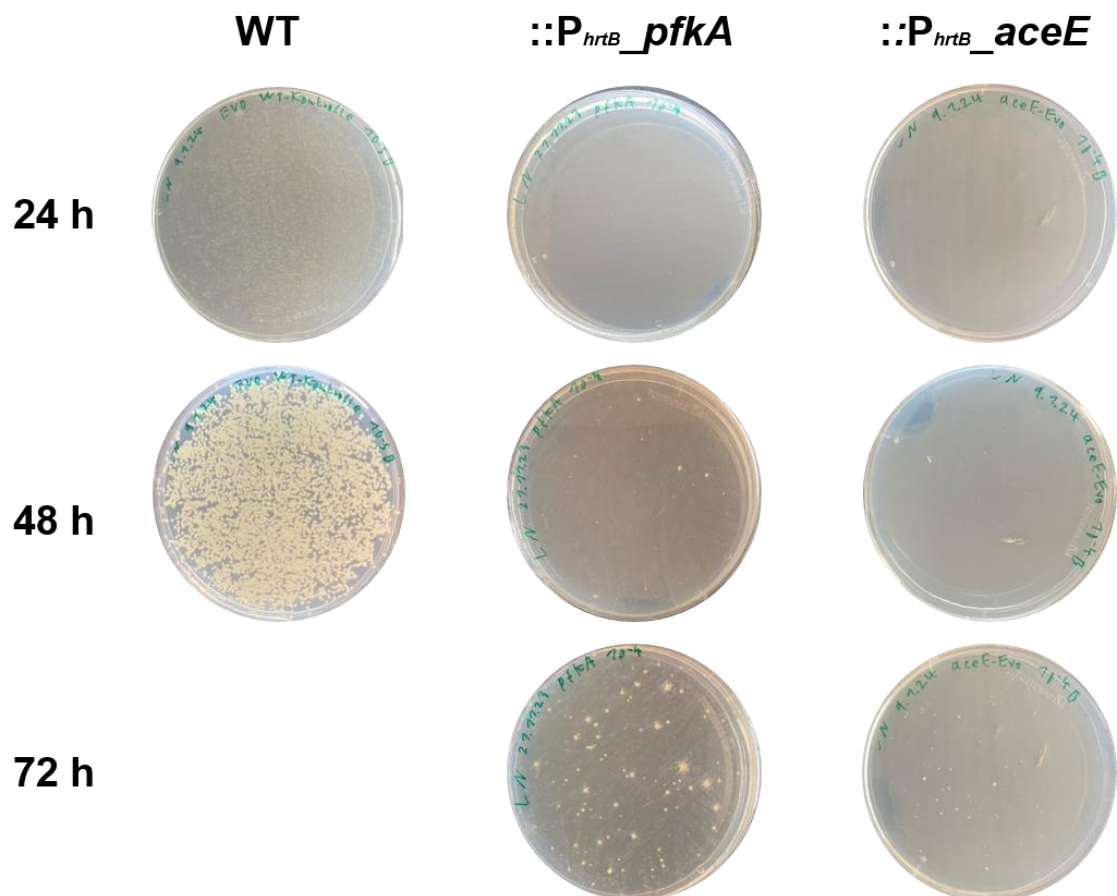

**Figure S2: Growth of different *C. glutamicum* heme-coupled biosensor strains in iron-rich conditions, second round.** *C. glutamicum* ATCC 13032 WT, ::P<sub>hrtB</sub>\_pfkA and ::P<sub>hrtB</sub>\_aceE were cultivated overnight in BHI, 30°C. Cultures were diluted by a factor of 10<sup>-4</sup> in 0.9% NaCl and plated on CGXII agar with 2% glucose and an iron excess of 100 μM FeSO<sub>4</sub>. Photographs were taken after 1,2 and 3 days of incubation.

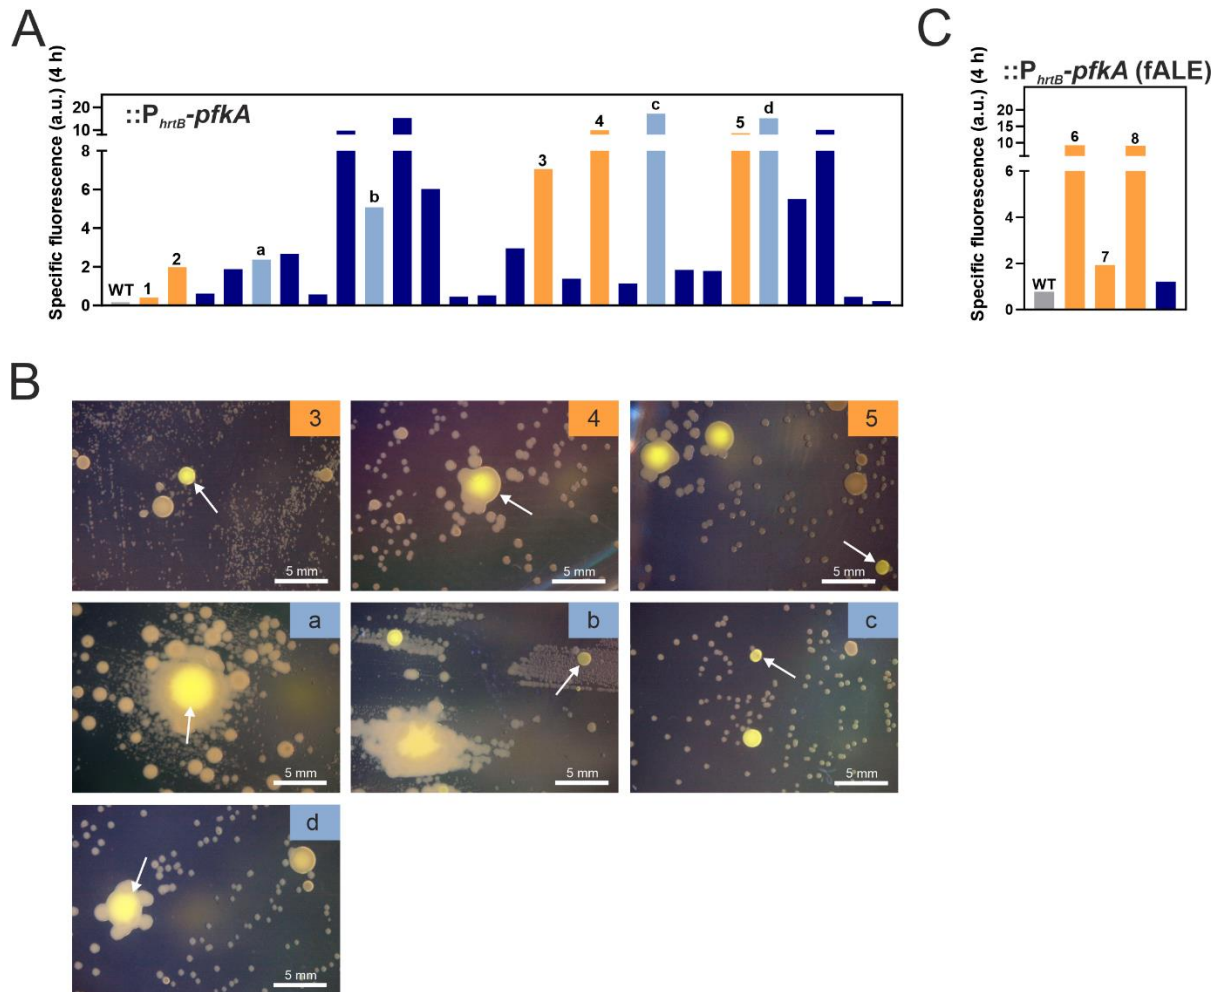

**Figure S3: Screening of evolved  $::PhrtB-pfkA$  clones for elevated  $hrtB$  expression.** (A) For a screening after adaptive laboratory evolution (ALE) on plates, the *C. glutamicum* WT as well as 27 evolved  $::P_{hrtB}-pfkA$  strains containing the plasmid pJC1- $P_{hrtB}-eyfp$  were inoculated to an  $OD_{600}$  of 1 in CGXII media containing 2% glucose and 100  $\mu M$   $FeSO_4$ . Reporter assays visualizing  $hrtB$ -expression were performed in a microbioreactor cultivation system. Shown is the specific fluorescence (absolute fluorescence/backscatter) in arbitrary units after 4 h of cultivation.  $n = 1$  biological replicates. Orange bars represent the fluorescent signal of clones that were chosen for further replicate analysis, labelled with their clone number above, as they are also listed within the main text. Light blue bars represent those for which also a microscopy picture is representatively available in (B), but were not chosen for further analysis. (B) Images of the plate evolution of several selected clones of varying sizes and fluorescence intensities were captured using the stereomicroscope Nikon SMZ18 ( $\lambda_{EX}$ : 500/20,  $\lambda_{EM}$ : 535/30). Arrows indicate the respective clone. (C) As in (A), four clones of the liquid f(luorescent)ALE are shown, with those chosen for further analysis depicted in orange.

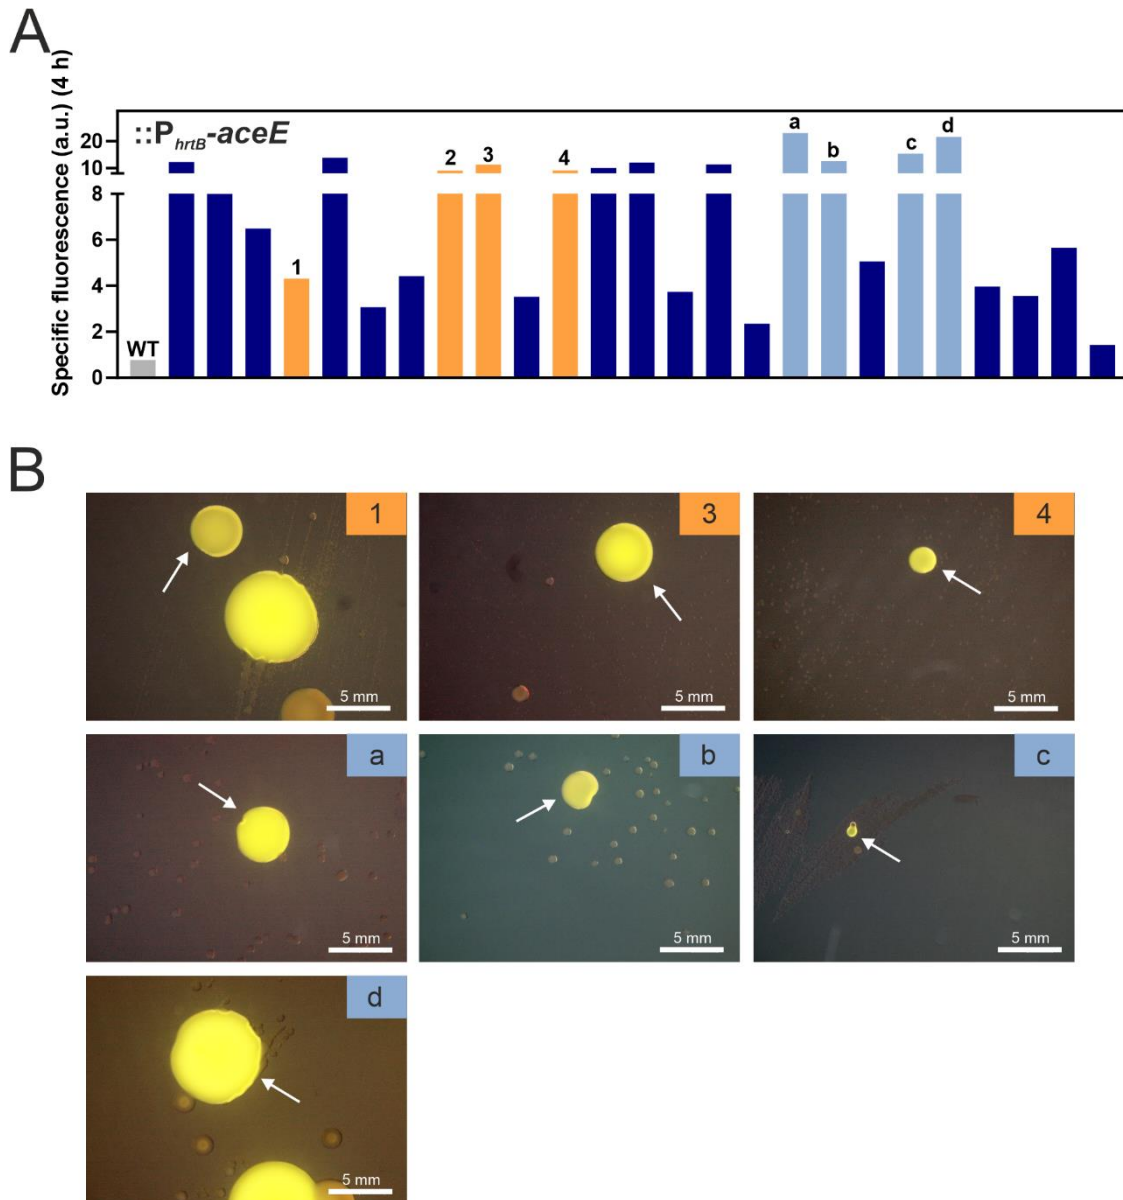

**Figure S4: Screening of evolved  $::P_{hrtB}\text{-}aceE$  clones for elevated  $hrtB$  expression.** (A) For a screening after adaptive laboratory evolution on plates, the *C. glutamicum* WT as well as 27 evolved  $::P_{hrtB}\text{-}aceE$  strains containing the plasmid  $pJC1\text{-}P_{hrtB}\text{-}eyfp$  were inoculated to an  $OD_{600}$  of 1 in CGXII media containing 2% glucose and 100  $\mu\text{M}$   $\text{FeSO}_4$ . Reporter assays visualizing  $hrtB$ -expression were performed in a microbioreactor cultivation system. Shown is the specific fluorescence (absolute fluorescence/backscatter) in arbitrary units after 4 h of cultivation.  $n = 1$  biological replicates. Orange bars represent the fluorescent signal of clones that were chosen for further analysis, labelled with their clone number above, as they are also listed within the main text. Light blue bars represent those for which also a microscopy picture is representatively available in (B), but were not chosen for further analysis. (B) Images of the plate evolution of several selected clones of differing sizes and fluorescence intensities using stereomicroscope Nikon SMZ18 ( $\lambda_{\text{Ex}} : 500/20$ ,  $\lambda_{\text{Em}} : 535/30$ ). Arrows indicate the respective clone.

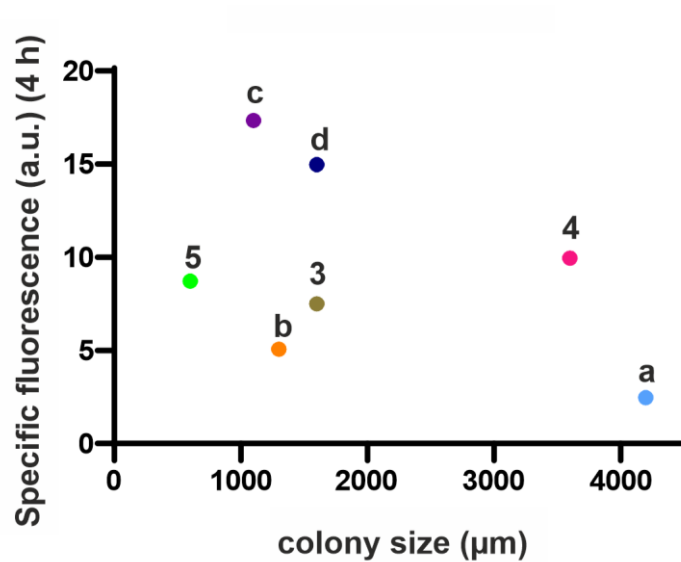

**Figure S5: Correlation of *hrtB*-expression at 4 h (peak specific fluorescence) and colony size.** The respective clones from the ALE of  $::P_{hrtB}\text{-}pfkA$  as shown in figure S3 are depicted, labeled each above the value point. Colony size in  $\mu\text{m}$  was measured using the measuring tool with the NIS-elements AR 5.30.03 software (Nikon, Japan), while the specific fluorescence was deduced from the microtiter cultivation experiment after 4 h, where specific fluorescence represents the measured fluorescence per backscatter (a.u.).

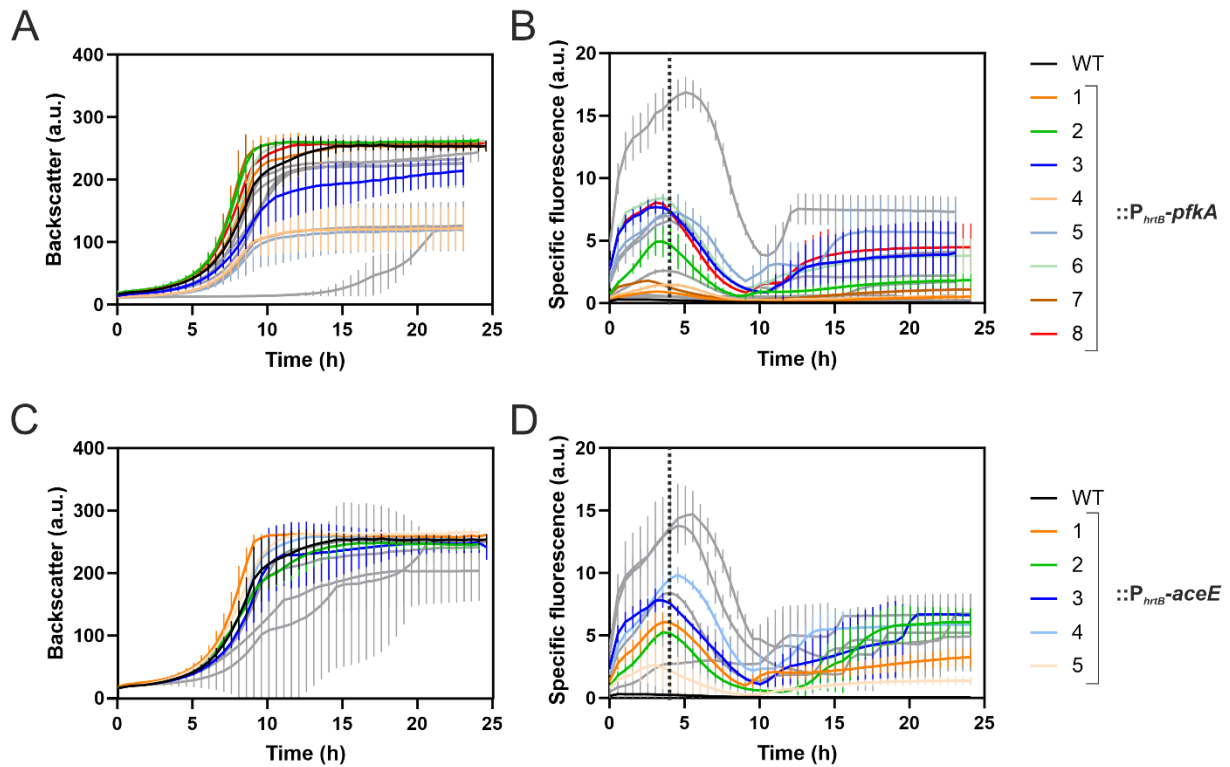

**Figure S6: Screening of evolved  $::P_{hrtB}\text{-}pfkA$  and  $::P_{hrtB}\text{-}aceE$  strains for increased *hrtB* expression.** Several evolved clones of *C. glutamicum* (A-B)  $::P_{hrtB}\text{-}pfkA$  and (C-D)  $::P_{hrtB}\text{-}aceE$  were selected and inoculated together with the WT in triplicates to an  $OD_{600}$  of 1 in CGXII media containing 2% glucose and 100  $\mu\text{M}$   $\text{FeSO}_4$ . Backscatter (a.u.) is depicted in (A) and (C), measured in a microbioreactor system. Specific fluorescence as shown in (B) and (D), respectively, is given by measured fluorescence (a.u.) divided by respective backscatter (a.u.). The dotted vertical line represents the timepoint 4 h, as it is summarized in Figure 4 (main text). Clones in grey were not chosen for further analysis.  $n = 3$  biological replicates.

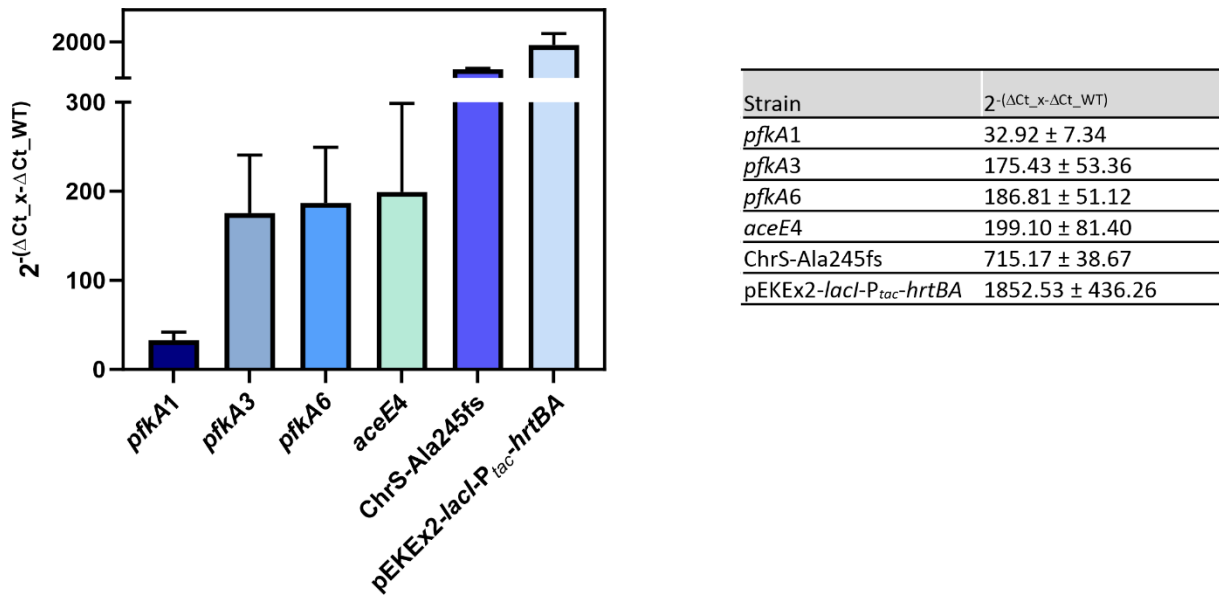

**Figure S7: qPCR analysis comparing expression levels of *hrtB* in a selection of clones from plate-based selections and fALE in comparison to the *C. glutamicum* WT.** The *C. glutamicum* WT, selected clones *pfkA1*, *pfkA3*, *pfkA6* and *aceE4* as well as the pseudokinase variant ChrS-Ala245fs (Krüger and Frunzke, 2022) and a strain harboring the *hrtB*-overexpression plasmid pEKEx2-lacI-P<sub>tac</sub>-*hrtBA* (Heyer et al., 2012) as positive controls were inoculated in 1 mL CGXII medium supplemented with 2% glucose and 100  $\mu$ M FeSO<sub>4</sub> in deep-well plates. After 4 h, the culture was harvested in ice-falcons for RNA isolation via the Monarch Total RNA Miniprep Kit (New England BioLabs, Frankfurt am Main). Using the Luna One-Step RT-qPCR Kit (New England BioLabs, Frankfurt am Main) according to manufacturer's instructions, qPCR was performed in a qTower device (Analytik Jena, Jena). Analysis followed using qPCRsoft 3.1 (Analytik Jena, Jena). The housekeeping gene *ddh* served as reference for normalization. Data represents three biological and two technical replicates. Fold-change was calculated according to the  $2^{-\Delta\Delta C_t}$  method (Livak and Schmittgen, 2001).



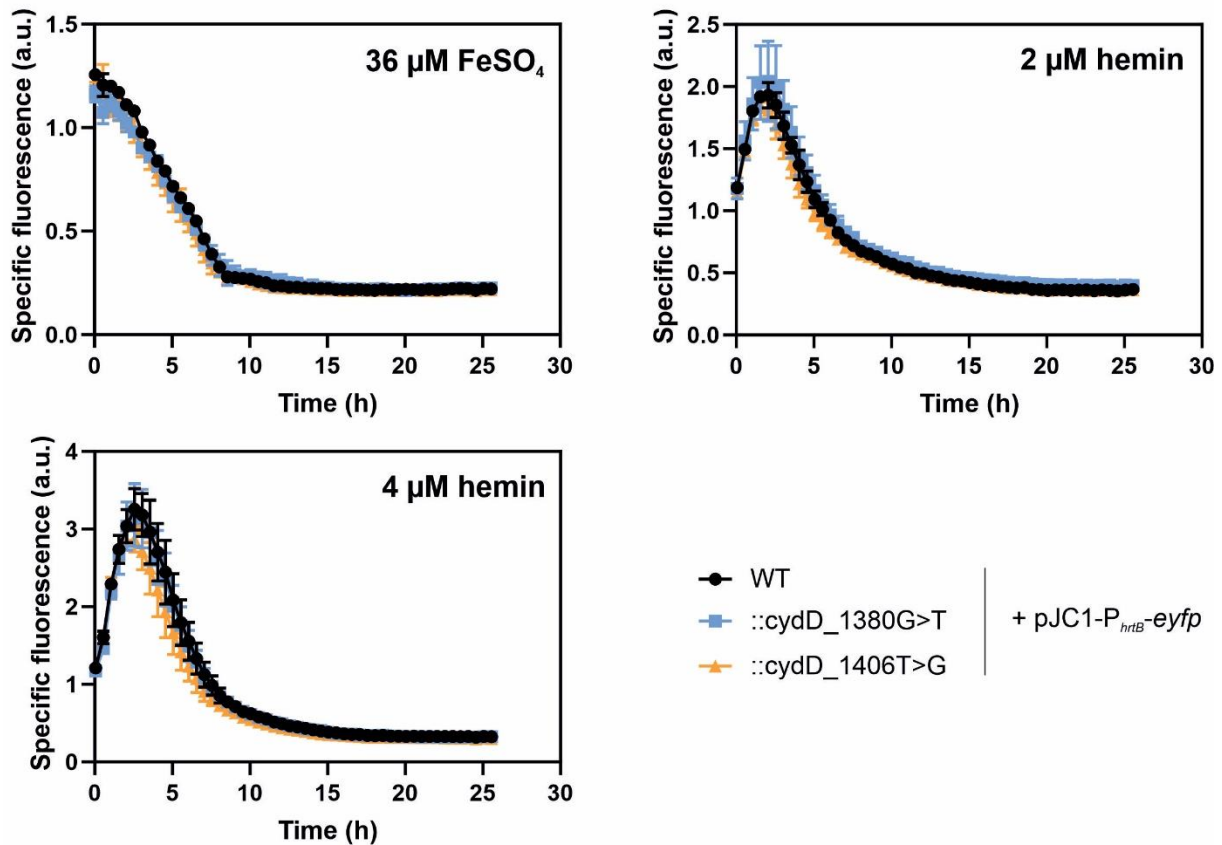

**Figure S8: Influence on *cydD* single nucleotide polymorphisms on *hrtB* expression.** The mutations 1380G>T and 1406T>G as found in the ALE experiment were separately introduced into *C. glutamicum*. These strains, as well as the WT, were transformed with the reporter plasmid pJC1-P<sub>*hrtB*</sub>-*eyfp* (Heyer et al., 2012) and inoculated in triplicates to an OD<sub>600</sub> of 1 in CGXII media containing 2% glucose and 36 μM FeSO<sub>4</sub>, or no FeSO<sub>4</sub> but 2 μM or 4 μM hemin. Specific fluorescence is given by fluorescence (a.u.) divided by respective backscatter (a.u.) measured in a microbioreactor system. n = 3 biological replicates.

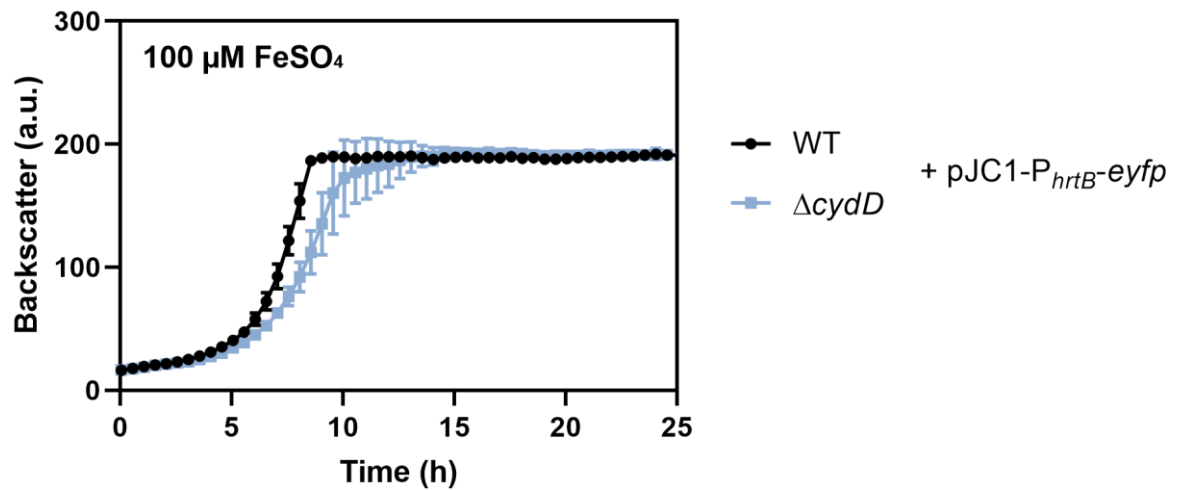

**Figure S9: Growth analysis of a *cydD*-deficient *C. glutamicum* strain in iron excess.** (A) The *C. glutamicum* WT (black) as well as the *cydD* deletion strain  $\Delta\text{cydD}$  (blue) were transformed with the plasmid pJC1- $P_{hrtB}$ -*eyfp*. These were inoculated to an  $\text{OD}_{600}$  of 1 in CGXII media containing 2 % glucose and 100  $\mu\text{M}$   $\text{FeSO}_4$ . Growth was monitored as backscatter (a.u.) in a microbioreactor system.  $n = 3$  biological replicates. Respective *hrtB*-reporter output is depicted in Figure 4.

**Table S1: Oligonucleotides used in this study**

| Oligonucleotide         | Sequence 5' → 3'                                       | Use                                                                |
|-------------------------|--------------------------------------------------------|--------------------------------------------------------------------|
| A416_term_fw            | <b>TTTTGGCGGATGAGAGAAGA</b>                            | Terminator                                                         |
| A417_term_rv            | <b>CAAAAGAGTTTGTAGAAACGCA</b>                          |                                                                    |
| A418_IR_hrtB_fw         | <b>GTTTCTACAAACTCTTTTGCCACCACGATAGATCAACT</b>          | Intergenic region of <i>hrtB</i> and <i>chrS</i>                   |
| A419_IR_hrtB_rv         | <b>ATGATATCTCCTTCTTAAAGTTCATGCGGTGAGTTCTTTTAGTC</b>    |                                                                    |
| A414_pfkA_leftflank_fw  | <b>CCTGCAGGTCGACTCTAGAG</b> AGAGTCGCCCCGATAAGTTT       | Left flank for BS <i>pfkA</i>                                      |
| A415_pfkA_leftflank_rv  | <b>TCTTCTCTCATCCGCCAAAAT</b> TCTGACCATCTTATTTAATCGCCA  |                                                                    |
| A420_pfkA_rightflank_fw | <b>TGAAC</b> TTTAAGAAGGAGATATCATATGCGAATTGCTACTCTCACG  | Right flank for BS <i>pfkA</i>                                     |
| A421_pfkA_rightflank_rv | <b>TTGTAAAACGACGGCCAGT</b> GATACCTGCGTGCAGAGCAAT       |                                                                    |
| A422_hisD_leftflank_fw  | <b>CCTGCAGGTCGACTCTAGAG</b> TCCGGTGTGCTGAAGTTAA        | Left flank for BS <i>hisD</i>                                      |
| A423_hisD_leftflank_rv  | <b>TCTTCTCTCATCCGCCAAAAA</b> CCTATTGTATTCCCCACGTAAC    |                                                                    |
| A424_hisD_rightflank_fw | <b>TGAAC</b> TTTAAGAAGGAGATATCATATGTTGAATGTCAGTACCTGC  | Right flank for BS <i>hisD</i>                                     |
| A425_hisD_rightflank_rv | <b>TTGTAAAACGACGGCCAGT</b> GGACAGCCCACACCTCATCAA       |                                                                    |
| A426_pgi_leftflank_fw   | <b>CCTGCAGGTCGACTCTAGAG</b> CAGCGGAATCGGCTGGTTG        | Left flank for BS <i>pgi</i>                                       |
| A427_pgi_leftflank_rv   | <b>TCTTCTCTCATCCGCCAAAAG</b> GTGCGTTTATTGGGCTGCT       |                                                                    |
| A428_pgi_rightflank_fw  | <b>TGAAC</b> TTTAAGAAGGAGATATCATATGGCGGACATTTTCGACCAC  | Right flank for BS <i>pgi</i>                                      |
| A429_pgi_rightflank_rv  | <b>TTGTAAAACGACGGCCAGT</b> GGCTGAGATACCAGCGGTGCG       |                                                                    |
| A434_aceE_leftflank_fw  | <b>CCTGCAGGTCGACTCTAGAG</b> CATGGATTCAACATGAAACCGC     | Left flank for BS <i>aceE</i>                                      |
| A435_aceE_leftflank_rv  | <b>TCTTCTCTCATCCGCCAAAAC</b> ACGCCGAAGTGCACGAATG       |                                                                    |
| A436_aceE_rightflank_fw | <b>TGAAC</b> TTTAAGAAGGAGATATCATATGGCCGATCAAGCAAAACTTG | Right flank for BS <i>aceE</i>                                     |
| A437_aceE_rightflank_rv | <b>TTGTAAAACGACGGCCAGT</b> GCCTCCATGAATGCACGTGCG       |                                                                    |
| M19                     | CGCCAGGGTTTTCCAGTCAC                                   | Sequencing around MCS of pK19 plasmids                             |
| M20                     | AGCGGATAACAATTTACACAGGA                                |                                                                    |
| leftflank_cydD_del_fw   | <b>CAGGTCGACTCTAGAGGATC</b> CTGGCATGGTCAACGTCTTC       | Left flank for $\Delta$ <i>cydD</i>                                |
| leftflank_cydD_del_rv   | <b>GTCTGTAACCGAGCATCTCTCCT</b> AGCGCAAAAGCCGCGGATCGAC  |                                                                    |
| rightflank_cydD_del_fw  | <b>GAGAGATGCTCGGTTACAGACT</b> CTCTGTTGGATGAGCCGAC      | Right flank for $\Delta$ <i>cydD</i>                               |
| rightflank_cydD_del_rv  | <b>GTAAAACGACGGCCAGTGAATT</b> GGACATCGGCAACCGAATCGA    |                                                                    |
| cydD-seq fw             | TCTACCAAGGCTGGACCTAC                                   | Sequencing <i>cydD</i> region                                      |
| cydD-seq rv             | CATCACTGGCGGCATTTCCC                                   |                                                                    |
| A156-ddh-qPCR-fw        | CCGGAAAGCAAACCCACAAG                                   | Housekeeping gene for normalization in qPCR (Frunzke et al., 2008) |
| A157-ddh-qPCR-rv        | CTCGGAGTCGAAGGTTGCTT                                   |                                                                    |
| A269-hrtB-qPCR-fw       | TCCGATTTAGCCTCACTCGC                                   | Gene of interest for qPCR (Krüger and Frunzke, 2022)               |
| A270-hrtB-qPCR-rv       | AGTGACATCTGTTCCGCCCTG                                  |                                                                    |

Coloring scheme: **overlap terminator**, **overlap terminator**, **Stop**, **RBS** and **linker**, **overlap backbone**, **overlap linker**; BS = biosensor ::P<sub>*hrtB*</sub>, MCS = multiple cloning site.

**Table S2: Mutations established from ALE experiments with *C. glutamicum* ::P<sub>hrtB</sub>\_pfkA and ::P<sub>hrtB</sub>\_aceE**

| Clone                      | Mutation*                            | Gene                      | Annotation                                                                                           |
|----------------------------|--------------------------------------|---------------------------|------------------------------------------------------------------------------------------------------|
| <i>pfkA1, pfkA2</i>        | Exchange<br>A276V                    | NCgl2410                  | putative sugar diacid utilization transcriptional regulator                                          |
| <i>pfkA3</i>               | R307H                                | NCgl2276                  | Xanthine permease / 2-oxo-4-hydroxy-4-carboxy-5-ureidoimidazoline (OHCU) decarboxylase (EC 4.1.1.97) |
| <i>pfkA3, pfkA4, pfkA5</i> | A276V                                | NCgl2410                  | hypothetical protein                                                                                 |
| <i>pfkA4</i>               | V358G                                | NCgl0322                  | 5'-nucleotidase (EC 3.1.3.5)                                                                         |
| <i>pfkA5</i>               | G68S                                 | NCgl0468                  | LSU ribosomal protein L10p (P0)                                                                      |
| <i>pfkA6, pfkA7, pfkA8</i> | Exchange S164P                       | <i>miaB</i><br>(NCgl1874) | tRNA-i(6)A37 methylthiotransferase (EC 2.8.4.3)                                                      |
| <i>pfkA6, pfkA7, pfkA8</i> | Exchange C to T                      | Intergenic                |                                                                                                      |
| <i>pfkA6, pfkA7, pfkA8</i> | Deletion<br>GCCCCCGCG to<br>GCCCCGCG | Intergenic                |                                                                                                      |
| <i>pfkA6, pfkA7, pfkA8</i> | Exchange<br>D385N                    | <i>benR</i><br>(NCgl2324) | Putative transcription regulator                                                                     |
| <i>pfkA6, pfkA7, pfkA8</i> | Exchange<br>A276V                    | NCgl2410                  | putative sugar diacid utilization transcriptional regulator                                          |
| <i>pfkA6, pfkA7, pfkA8</i> | Exchange E305D                       | <i>wzz</i><br>(NCgl0337)  | Tyrosine-protein kinase (EC 2.7.10.2)                                                                |
| <i>pfkA6, pfkA7, pfkA8</i> | Deletion E189fs                      | NCgl0627                  | 2-methylcitrate dehydratase (EC 4.2.1.79)                                                            |
| <i>pfkA7</i>               | Exchange Y91S                        | NCgl0919                  | hypothetical protein                                                                                 |
| <i>pfkA7</i>               | Exchange L854R                       | NCgl1737                  | putative membrane protein CGP3 region                                                                |
| <i>pfkA8</i>               | Exchange L184P                       | <i>bioQ</i><br>(NCgl2025) | Predicted biotin repressor from TetR family                                                          |
| <i>aceE3, aceE 4</i>       | Exchange<br>GTGTGGAA to<br>ATATCAT   | Intergenic                | hypothetical protein                                                                                 |
| <i>aceE1</i>               | Exchange R350C                       | NCgl1012                  | putative Mg-chelatase subunit ChII, Inorganic ion transport, metabolism, and storage                 |
| <i>aceE1</i>               | Exchange S70F                        | <i>ssuB</i><br>(NCgl1175) | aliphatic sulfonates ATP-binding ABC transporterprotein, essential for uptake of alkylsulfonates     |
| <i>aceE1</i>               | Exchange E122K                       | <i>gpsA</i><br>(NCgl1266) | NADPH-dependent glycerol-3-phosphate dehydrogenase                                                   |
| <i>aceE1</i>               | Exchange S362N                       | NCgl1687                  | puative MoxR-like ATPase CGP3 region, Prophage gene                                                  |
| <i>aceE1</i>               | Exchange R80H                        | <i>phoU</i><br>(NCgl2482) | phosphate uptake regulator                                                                           |
| <i>aceE1</i>               | Exchange V97A                        | <i>ispD</i><br>(NCgl2570) | 2-C-methyl-D-erythritol 4-phosphate cytidyltransferase                                               |
| <i>aceE1</i>               | Exchange<br>A1910T                   | NCgl0705                  | Putative helicase                                                                                    |

\*= As identified by BV-BRC web resources (3.34.11)

## References

Frunzke, J., Bramkamp, M., Schweitzer, J.E., and Bott, M. (2008). Population Heterogeneity in *Corynebacterium glutamicum* ATCC 13032 caused by prophage CGP3. *J Bacteriol* *190*, 5111-5119.

Heyer, A., Gätgens, C., Hentschel, E., Kalinowski, J., Bott, M., and Frunzke, J. (2012). The two-component system ChrSA is crucial for haem tolerance and interferes with HrrSA in haem-dependent gene regulation in *Corynebacterium glutamicum*. *Microbiology (Reading)* *158*, 3020-3031.

Krüger, A., and Frunzke, J. (2022). A pseudokinase version of the histidine kinase ChrS promotes high heme tolerance of *Corynebacterium glutamicum*. *Front Microbiol* *13*, 997448.

Livak, K.J., and Schmittgen, T.D. (2001). Analysis of relative gene expression data using real-time quantitative PCR and the 2(-Delta Delta C(T)) Method. *Methods* *25*, 402-408.
